# Supplementary material
Source: MDPI journal article supplement (https://www.mdpi.com/1424-2818/15/11/1108)

## Supplementary Materials

**Table S1.** Frequency and time parameters of echolocation calls for *Pipistrellus kuhlii* at four sites in the Tunisian desert: Kruskal–Wallis tests and ad hoc multiple paired comparisons.

|                          |                    |                    |                  |
|--------------------------|--------------------|--------------------|------------------|
| SF - H = 24.57           | Bordj Khadra r. b. | Bordj Khadra oasis | Oued Dkouk N. R. |
| Ain Rhziza               | p < 0.001          | p < 0.001          | p < 0.001        |
| Bordj el Khadra reed bed |                    | NS                 | NS               |
| Bordj el Khadra oasis    |                    |                    | NS               |
|                          | 2                  | 3                  | 4                |
| FMAXE - H = 706.34       | Bordj Khadra r. b. | Bordj K. oasis     | Oued Dkouk N. R. |
| Ain Rhziza               | p < 0.001          | p < 0.001          | p < 0.001        |
| Bordj el Khadra reed bed |                    | NS                 | p < 0.001        |
| Bordj el Khadra oasis    |                    |                    | p < 0.001        |
|                          | 2                  | 3                  | 4                |
| EF - H = 797.65          | Bordj Khadra r. b. | Bordj K. oasis     | Oued Dkouk N. R. |
| Ain Rhziza               | p < 0.001          | p < 0.001          | NS               |
| Bordj el Khadra reed bed |                    | p < 0.05           | p < 0.001        |
| Bordj el Khadra oasis    |                    |                    | p < 0.001        |
|                          | 2                  | 3                  | 4                |
| D - H = 50.63            | Bordj Khadra r. b. | Bordj K. oasis     | Oued Dkouk N. R. |
| Ain Rhziza               | NS                 | p < 0.001          | p < 0.05         |
| Bordj el Khadra reed bed |                    | NS                 | p < 0.001        |
| Bordj el Khadra oasis    |                    |                    | p < 0.001        |
|                          | 2                  | 3                  | 4                |
| IPI - H = 119.22         | Bordj Khadra r. b. | Bordj K. oasis     | Oued Dkouk N. R. |
| Ain Rhziza               | p < 0.001          | p < 0.001          | NS               |
| Bordj el Khadra reed bed |                    | p < 0.05           | p < 0.001        |
| Bordj el Khadra oasis    |                    |                    | NS               |

**Table S2.** Comparisons (Chi-square tests) of overnight activity among sites and periods at four sites in the Tunisian desert.

|                              | Chi-square | df | p-value |
|------------------------------|------------|----|---------|
| Sites * periods              | 1990.20    | 57 | < 0.001 |
| Sites                        | 47.94      | 3  | < 0.001 |
| Period—Oued Dkouk N. R.      | 643.64     | 17 | < 0.001 |
| Period—Ain Rhziza.           | 5033.45    | 17 | < 0.001 |
| Period—Bordj Khadra reed bed | 480.86     | 19 | < 0.001 |
| Period—Bordj Khadra oasis    | 1085.96    | 19 | < 0.001 |

**Figure S1.** Boxplots of frequency and time parameters of echolocation calls for *Pipistrellus kuhlii* at four sites of the Tunisian desert: SF: start frequency (kHz), FMAXE: frequency of maximum energy (kHz), EF: end frequency (kHz), BW: bandwidth (kHz), D: duration (ms), IPI: interpulse interval (ms). 1: Oued Dkouk Nature Reserve, 2: Ain Rhziza, 3: Bordj el Khadra reed bed, 4: Bordj el Khadra oasis.

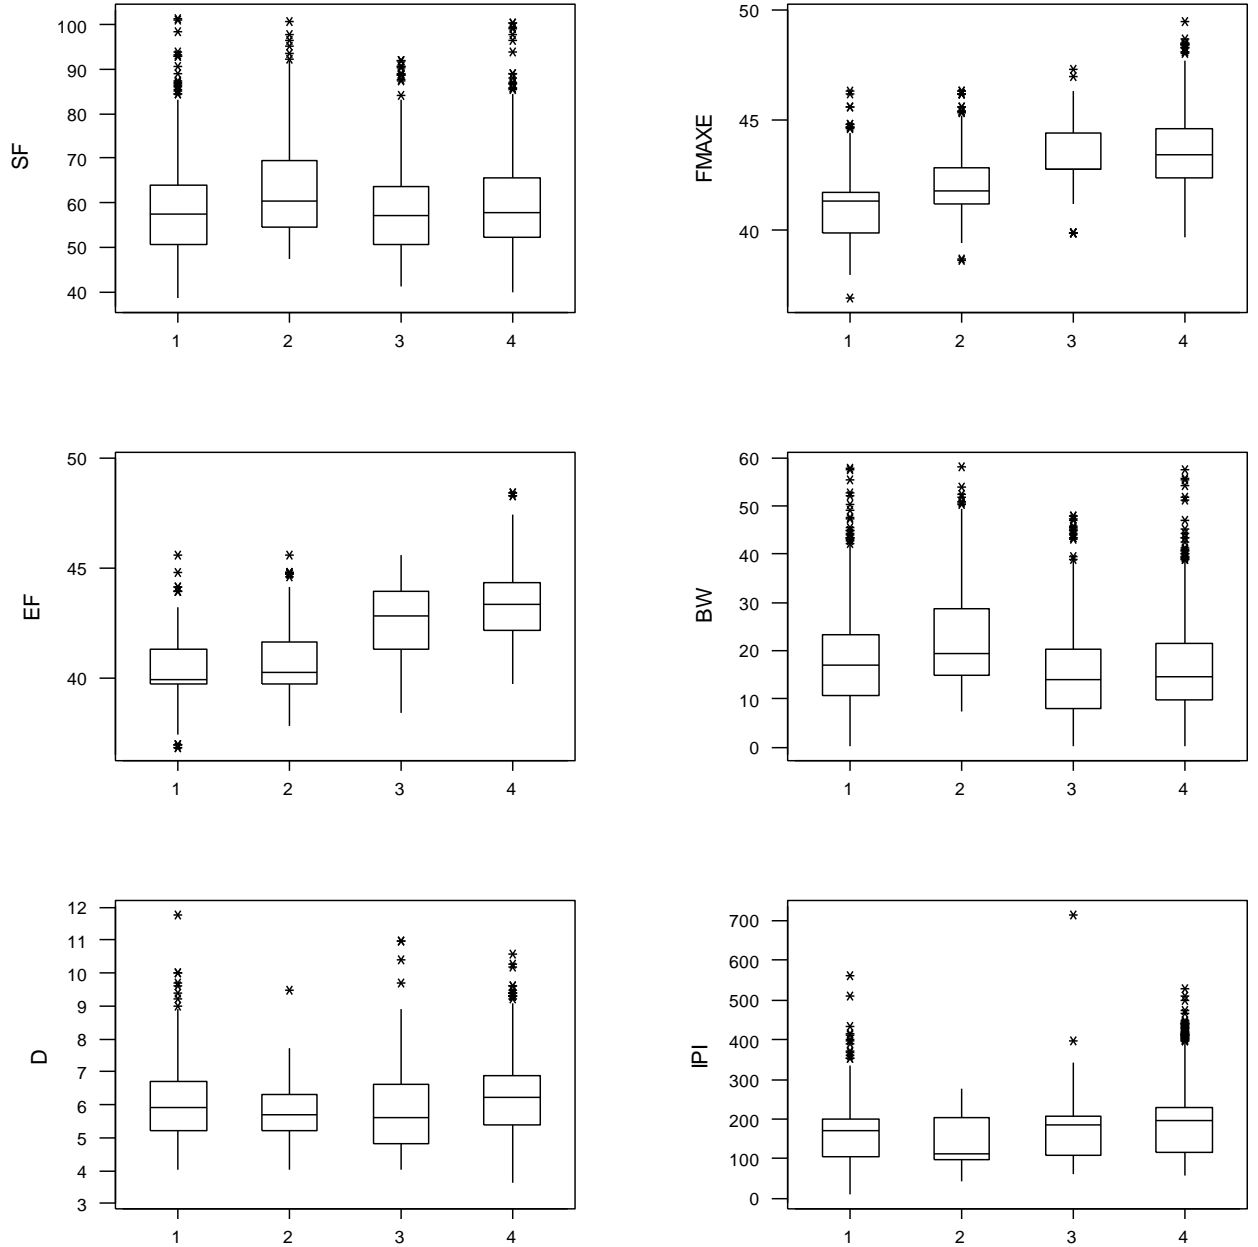

**Figure S2.** Night activity (number of passes per 30 min) of *Pipistrellus kuhlii* (blue), *Eptesicus isabbelinus* (red) and *Tadarida teniotis* (green) recorded in May 2021 at Oued Dkouk Nature Reserve (Tunisian desert). Automatic echolocation call recording started 30 min before sunset and lasted 30 min after sunrise.

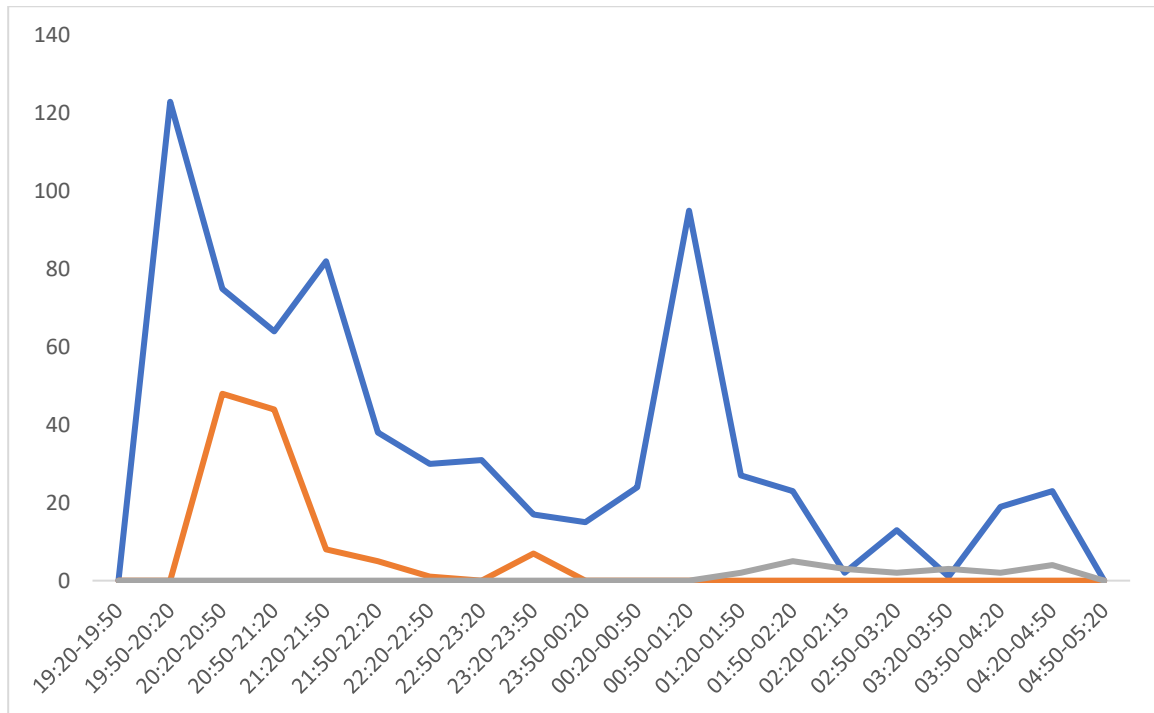

Supplement: s1 [file s1]
